# Supplementary material for: Relationship between loneliness, social isolation and modifiable risk factors for cardiovascular disease: a latent class analysis
Source: HighWire-hosted journal article supplement (doi:10.1136/jech-2020-215539), 2021-01-06
Supplement: jech-2020-215539supp001_data_supplement.pdf [file jech-2020-215539supp001_data_supplement.pdf]

## Supplementary Material

|             | hypertension |          |             |         |            |          |         |          |           |
|-------------|--------------|----------|-------------|---------|------------|----------|---------|----------|-----------|
| Diabetes    | 0.46         | Diabetes |             |         |            |          |         |          |           |
| Cholesterol | 0.22         | 0.17     | Cholesterol |         |            |          |         |          |           |
| Obesity     | 0.37         | 0.49     | 0.28        | Obesity |            |          |         |          |           |
| Depression  | 0.14         | 0.23     | 0.06        | 0.21    | Depression |          |         |          |           |
| Ab sleep    | 0.08         | 0.25     | 0.16        | 0.21    | 0.55       | Ab sleep |         |          |           |
| Smoking     | -0.14        | -0.08    | 0.09        | -0.13   | 0.32       | 0.26     | Smoking |          |           |
| Drinking    | 0.07         | -0.13    | -0.21       | -0.07   | -0.26      | -0.26    | -0.02   | Drinking |           |
| Poor diet   | 0.05         | 0.03     | 0.06        | -0.00   | 0.14       | 0.10     | 0.43    | 0.08     | Poor diet |
| Inactive    | 0.17         | 0.37     | 0.04        | 0.27    | 0.4        | 0.42     | 0.29    | -0.21    | 0.24      |

p<0.001 (chi<sup>2</sup> test)  
 p<0.01 (chi<sup>2</sup> test)  
 p<0.05 (chi<sup>2</sup> test)

Fig S1. Correlation matrix of the CVD risk variables (Goodman and Kruskal's gamma)

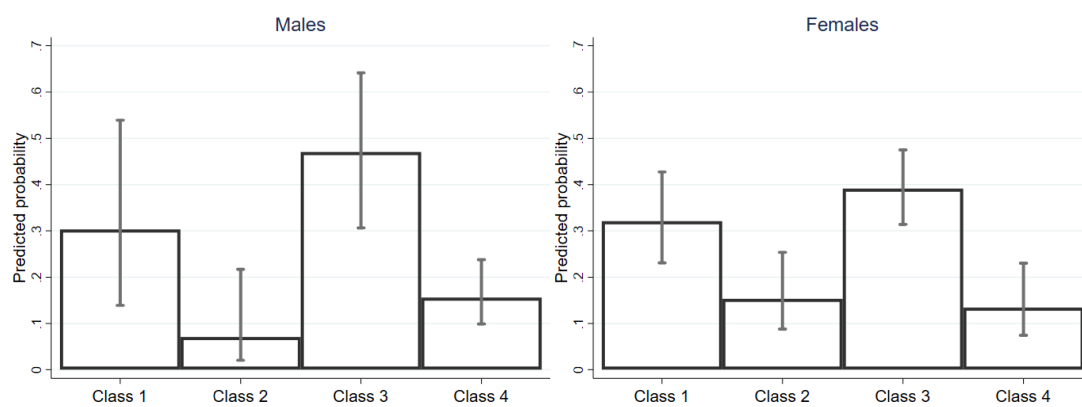

Fig S2. Predicted probability of class membership by sex from the multi-group model

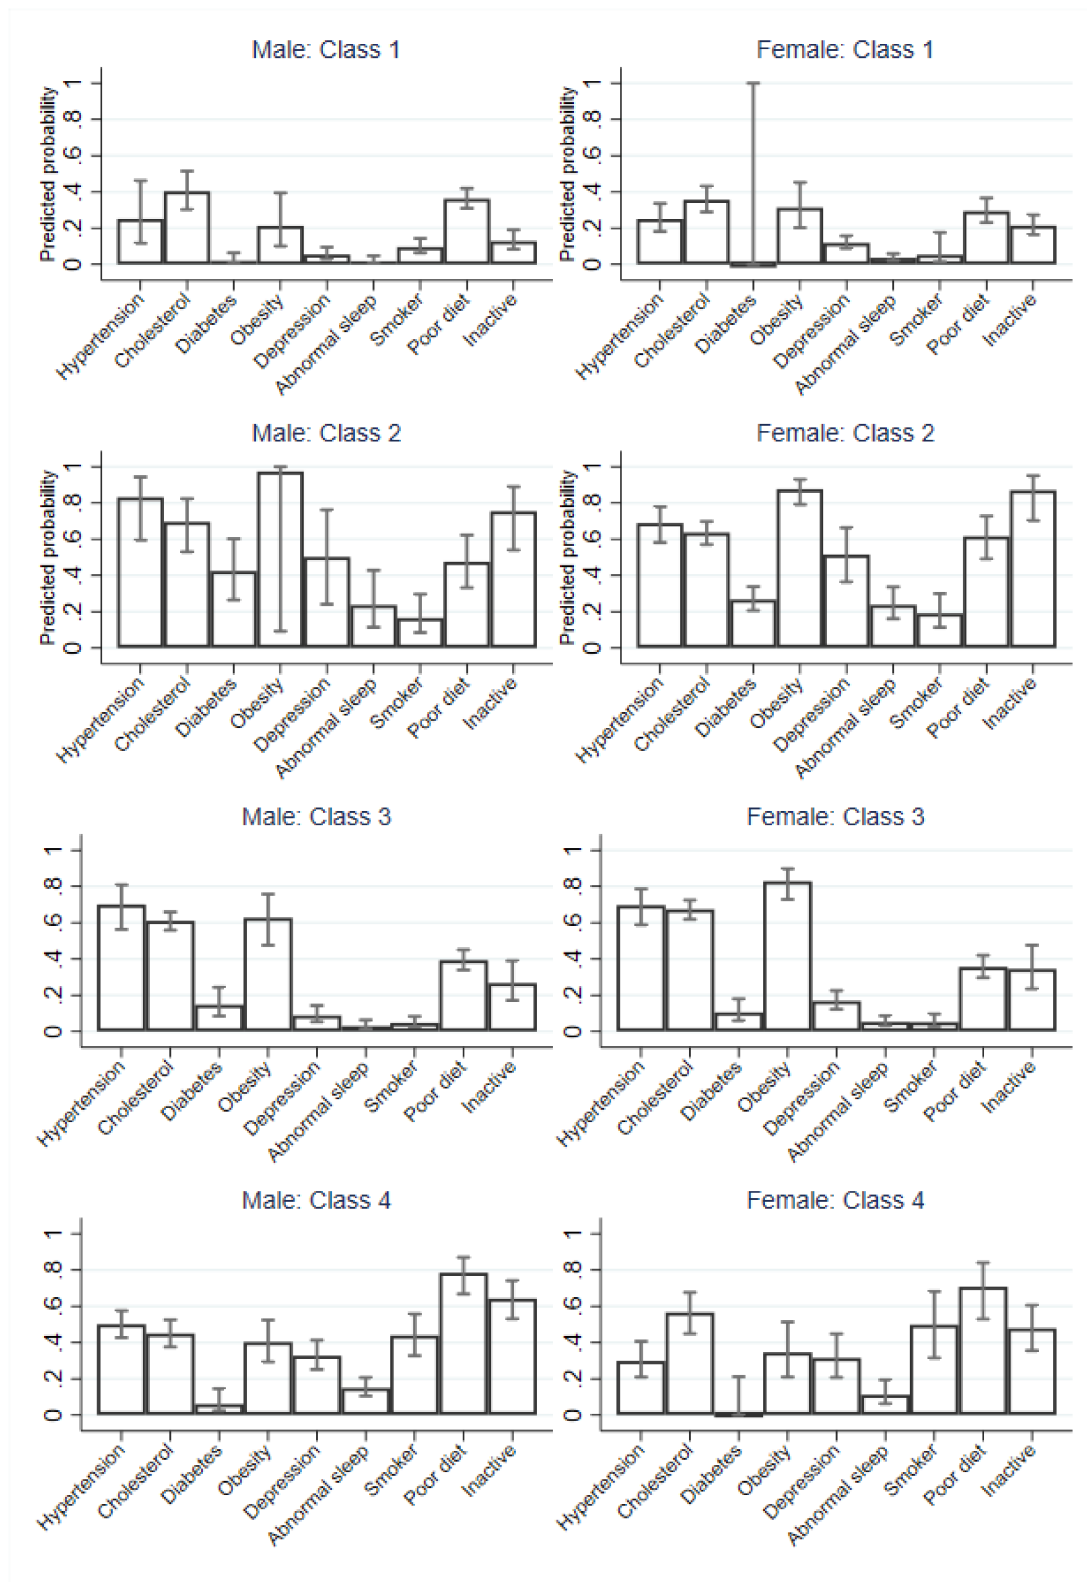

Fig S3. Predicted probabilities of CVD risks by latent classes from LCA and sex

Supplementary Table S1: Participants' characteristics by latent classes

|                               | All %  | Class 1:<br>Low-risk | Class 2:<br>High-risk | Class 3:<br>Clinical-risk | Class 4:<br>Lifestyle-risk |
|-------------------------------|--------|----------------------|-----------------------|---------------------------|----------------------------|
| Gender: Women                 | 55.05  | 52.21                | 64.91                 | 54.11                     | 56.94                      |
| Ethnicity: Non-white          | 2.56   | 2.12                 | 4.26                  | 2.50                      | 2.12                       |
| Age: 50-59                    | 28.26  | 36.14                | 19.47                 | 23.72                     | 36.69                      |
| 60-69                         | 37.11  | 38.22                | 33.27                 | 37.73                     | 34.99                      |
| 70-79                         | 24.43  | 18.72                | 28.30                 | 28.10                     | 19.69                      |
| 80+                           | 10.20  | 6.92                 | 18.97                 | 10.45                     | 8.64                       |
| Education: Low                | 28.01  | 18.37                | 46.39                 | 27.52                     | 40.65                      |
| Medium                        | 40.40  | 40.39                | 35.71                 | 41.62                     | 40.23                      |
| High                          | 31.58  | 41.24                | 17.90                 | 30.86                     | 19.12                      |
| Social class: Low             | 30.38  | 23.13                | 45.11                 | 29.19                     | 43.13                      |
| Medium                        | 35.36  | 35.15                | 33.37                 | 35.82                     | 36.32                      |
| High                          | 34.26  | 41.71                | 21.52                 | 34.99                     | 20.55                      |
| Wealth: 20% lowest            | 16.67  | 9.57                 | 34.61                 | 13.57                     | 34.82                      |
| Medium                        | 60.66  | 58.96                | 55.79                 | 63.77                     | 56.50                      |
| 20% highest                   | 22.67  | 31.47                | 9.61                  | 22.66                     | 8.67                       |
| Loneliness: 20% highest       | 20.23  | 16.23                | 38.88                 | 16.61                     | 33.16                      |
| Living: Alone                 | 25.42  | 19.76                | 40.97                 | 23.34                     | 36.12                      |
| Social isolation: 20% highest | 19.96  | 19.07                | 19.49                 | 20.10                     | 23.45                      |
| Disengagement: 20% highest    | 23.62  | 13.45                | 46.16                 | 21.33                     | 49.34                      |
| Health: Existing CVD          | 24.47  | 17.57                | 40.67                 | 25.43                     | 21.95                      |
| N                             | 8,218† | 2,601                | 986                   | 3,925                     | 706                        |

Notes: † Education (0.2%), social class (2.2%), wealth (6.3%), loneliness (10.9%), social isolation (20.0%) and social disengagement (16.8%) contained missing values.
